# Supplementary material for: A highly specific and sensitive ratiometric fluorescent probe for carbon monoxide and its bioimaging applications
Source: Royal Society of Chemistry journal article supplement (doi:10.1039/c8nj03152e), 2018-01-01
Supplement: c8nj03152e1.pdf [file c8nj03152e1.pdf]

## Supporting Information

### **A highly specific and sensitive ratiometric fluorescent probe for carbon monoxide and its bioimaging applications**

Zuokai Wang,<sup>a</sup> Zhuofan Geng,<sup>a</sup> Ziyang Zhao,<sup>a</sup> Wenlong Sheng,<sup>b</sup> Caiyun Liu,<sup>a\*</sup> Xiaoyu Lv,<sup>a</sup> Qiuxia He,<sup>b\*</sup> and Baocun Zhu<sup>a\*</sup>

<sup>a</sup> School of Resources and Environment, University of Jinan, Shandong Provincial Engineering Technology Research Center for Ecological Carbon Sink and Capture Utilization, Jinan 250022, P. R. China.

<sup>b</sup> Qilu University of Technology (Shandong Academy of Sciences), Biology Institute of Shandong Academy of Sciences, 19 Keyuan Road, Lixia District, Jinan, 250014, Shandong Province, P. R. China.

\*Corresponding author. Fax: +86-531-82767617; Tel.: +86-531-82767617

E-mail address: lcyzbc@163.com (B. Zhu), liucaiyun1982072@163.com (C. Liu), and heqiuxia8008@163.com (Q. He)

## Table of Contents

1. Determination of the detection limit
2. The NMR ( $^1\text{H}$  and  $^{13}\text{C}$ ) spectra of probe **Ratio-CO**
3. Preparation of reactive oxygen species
4. The mechanism of probe **Ratio-CO** for detection of CO
5. References

## 1. Determination of the detection limit

The detection limit was calculated based on the fluorescence titration. The fluorescence spectra of free probe **Ratio-CO** were measured by five times and its standard deviation was obtained. To gain the slope, the fluorescence intensity ratio at 545 nm and 455 nm ( $F_{545}/F_{455}$ ) were plotted as the increasing concentrations of CO. So the detection limit was calculated with the following equation (1):

$$\text{Detection limit} = 3\sigma/k \quad (1)$$

Where  $\sigma$  is the standard deviation of blank measurement,  $k$  is the slope between the fluorescence intensities versus the concentrations of CO.

## 2. The NMR ( $^1\text{H}$ and $^{13}\text{C}$ ) spectra of probe **Ratio-CO**



**Figure S1.** The  $^1\text{H}$  NMR spectra of probe **Ratio-CO**



**Figure S2.** The  $^1\text{H}$  NMR spectra of probe **Ratio-CO**

### 3. Preparation of reactive oxygen species

Hydrogen peroxide ( $\text{H}_2\text{O}_2$ ), sodium hypochlorite ( $\text{NaOCl}$ ), and *tert*-butylhydroperoxide (TBHP) were diluted from the commercially available solution to 0.01 M in ultrapure water. Hydroxyl radical ( $\cdot\text{OH}$ ) and *tert*-butoxy radical ( $\cdot\text{O}^t\text{Bu}$ ) were generated by reaction of 1 mM  $\text{Fe}^{2+}$  with 1 mM  $\text{H}_2\text{O}_2$  or 1 mM TBHP respectively. Superoxide anion ( $\text{O}_2^-$ ) was prepared from  $\text{KO}_2$  in DMSO. The concentration of  $\text{H}_2\text{O}_2$  was determined from the absorbance at 240 nm ( $\epsilon = 43.6 \text{ M}^{-1} \text{ cm}^{-1}$ ). The concentration of  $\cdot\text{OCl}$  was determined from the absorbance at 292 nm ( $\epsilon = 350 \text{ M}^{-1} \text{ cm}^{-1}$ ).

### 4. The mechanism of probe Ratio-CO for detection of CO

When the hydroxyl group at the 4-site of 1,8-naphthalimide fluorophore was protected with allyl moiety, its electron-donating ability was suppressed.<sup>1</sup> While  $\text{Pd}^{2+}$  was reduced to  $\text{Pd}(0)$  by  $\text{CO}$ ,<sup>2,3</sup> and  $\text{Pd}(0)$  removed the allylic ether bond by the

Tsuji-Trost reaction.<sup>4,5</sup> As a result, the hydroxyl group at the 4-site of 1,8-naphthalimide was released, leading to the generation of stronger intramolecular charge transfer (ICT) structure.<sup>1</sup> Consequently, a large red-shifted fluorescence spectrum was obtained upon the addition of CO in the presence of Pd<sup>2+</sup>.



**Scheme S1.** The recognition mechanism of probe **Ratio-CO** for detection of CO.

## 5. References

1. B. Zhu, C. Gao, Y. Zhao, C. Liu, Y. Li, Q. Wei, Z. Ma, B. Du, X. Zhang, *Chem. Commun.*, 2011, **47**, 8656-8658.
2. W. R. Kitley, P. J. S. Maria, R. A. Cloyd, L. M. Wysocki, *Chem. Commun.*, 2015, **51**, 8520-8523.
3. S. Feng, D. Liu, W. Feng, G. Feng, *Anal. Chem.*, 2017, **89**, 3754-3762.
4. F. Song, A. L. Garner, K. Koide, *J. Am. Chem. Soc.*, 2007, **129**, 12354-12355.
5. A. L. Garner, F. Song, K. Koid, *J. Am. Chem. Soc.*, 2009, **131**, 5163-5167.
